# Supplementary material for: The structure and potential allergenicity of peanut allergen monomers after roasting
Source: Royal Society of Chemistry journal article supplement (doi:10.1039/d3fo05351b), 2024-01-01
Supplement: d3fo05351b1.pdf [file d3fo05351b1.pdf]

## 1 Supporting Information

### 2 Structure and potential allergenicity of peanut allergen monomers

### 3 after roasting

#### 4 Table S1 Information of peanut allergic patients.

| Number | Gender | Age | Clinical symptoms                                             | Total IgE level (IU/mL) | Specific IgE level to peanut (IU/mL) |
|--------|--------|-----|---------------------------------------------------------------|-------------------------|--------------------------------------|
| 1      | Male   | 21  | Elevated IgE                                                  | 238                     | 20.6                                 |
| 2      | Male   | 23  | Allergic rhinitis                                             | ND*                     | >=100                                |
| 3      | Male   | 19  | Allergic rhinitis                                             | 95.605                  | 42.299                               |
| 4      | Female | 21  | Allergic rhinitis                                             | 233                     | 55.6                                 |
| 5      | Male   | 23  | Allergic rhinitis, multiple allergies                         | 9082.5                  | 46.3                                 |
| 6      | Female | 49  | Allergic rhinitis, asthma, celiac disease, multiple allergies | 370                     | 77.4                                 |
| 7      | Male   | 15  | Allergic rhinitis, multiple allergies                         | ND*                     | 24.3                                 |
| 8      | Male   | 21  | Allergic rhinitis, food allergy                               | 977.378                 | >=100                                |
| 9      | Male   | 26  | Allergic rhinitis                                             | ND*                     | >=100                                |
| 10     | Female | 23  | Allergic rhinitis, multiple allergies                         | 852                     | 43.3                                 |
| 11     | Male   | 22  | Allergic rhinitis, asthma, multiple allergies                 | 3532                    | 47.9                                 |

5 \*ND, not detected

6

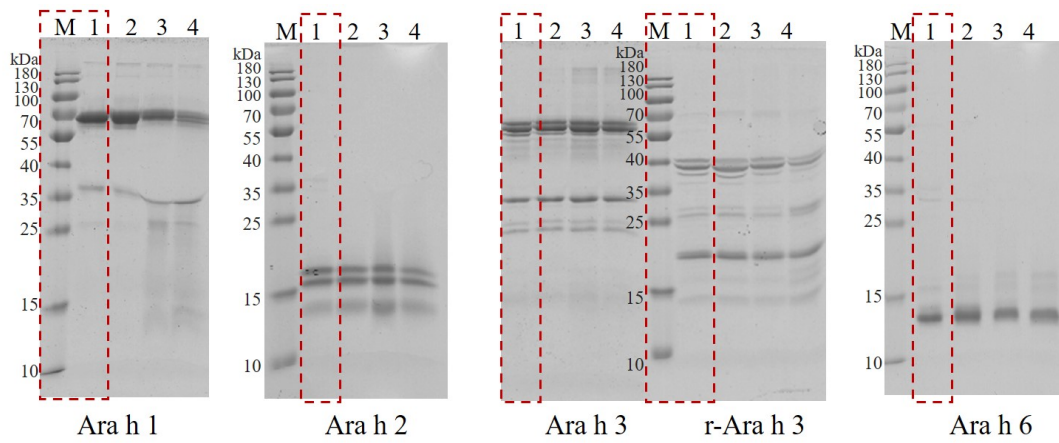

7  
 8 **Figure S1** Raw images of SDS-PAGE of separated major allergens from raw (lane1)  
 9 and roasted (lane 2, 3,4) peanut. Lanes in Figure 1 were marked in red boxes.  
 10

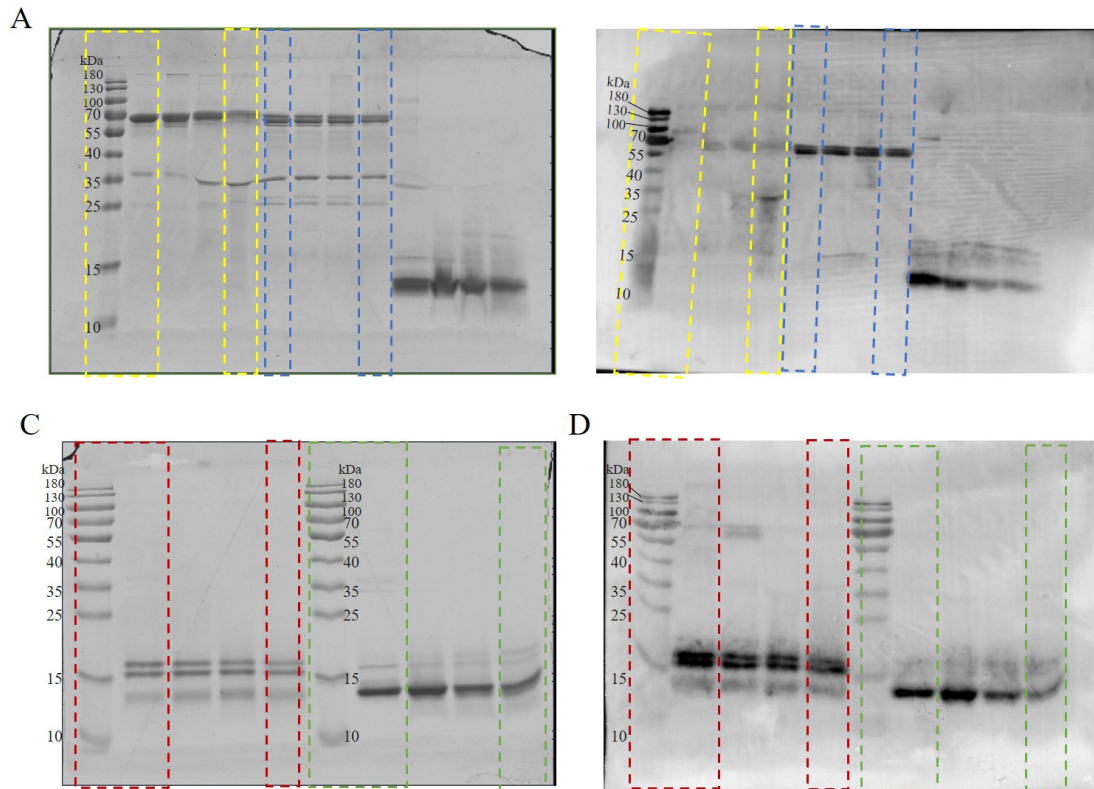

11

12 **Figure S2** Raw images of SDS-PAGE (A, C) and Western blotting (B, D) analysis of  
 13 allergens in raw and roasted peanut. Lanes in yellow boxes represented the SDS-PAGE  
 14 and Western blotting of Ara h 1 in Figure 4 A; Lanes in red boxes represented the SDS-  
 15 PAGE and Western blotting of Ara h 2 in Figure 4 B; Lanes in blue boxes represented  
 16 the SDS-PAGE and Western blotting of Ara h 3 in Figure 4 C; Lanes in green boxes  
 17 represented the SDS-PAGE and Western blotting of Ara h 6 in Figure 4 D.
